# Supplementary material for: A transposon surveillance mechanism that safeguards plant male fertility during stress
Source: bioRxiv or medRxiv preprint supplement (doi:10.1101/2020.10.03.324764), 2020-10-04
Supplement: Supplementary file [file media-1.pdf]

## 1 **Supplementary Materials**

### 3 **1. Materials and Methods:**

#### 5 **Plant material and growth conditions**

6 The maize cultivar A188 was used in all experiments. Plants were grown at 28°C day/ 20°C  
7 night in a 16 hr light/8 hr dark cycle with a light intensity of 230  $\mu\text{E m}^{-2} \text{s}^{-1}$ . Seeds were  
8 germinated in three-inch diameter pots containing peat-based soil and grown for three weeks  
9 before transferring to eleven-inch or 40 L pots to flowering. Anthers were manually dissected at  
10 v12 stage and meiotic stage was determined by acetocarmine staining. For heat stress  
11 experiments, maize plants grown in eleven-inch pots were transferred to growth chambers for 3  
12 days (16 h light at 35°C/ 8 h dark at 25°C, light intensity 230  $\mu\text{E m}^{-2} \text{s}^{-1}$ , humidity 75%).  
13 Tobacco plants (*Nicotiana benthamiana*) were grown on M2 soil (Levington Advance, UK) at  
14 22°C in a 16 h light/ 8 h dark cycle with light intensity of 100  $\mu\text{E m}^{-2} \text{s}^{-1}$ .

15

#### 16 **Identification of transposon insertion mutants**

17 To identify transposon insertion lines for Zm00001d007786 (GRMZM2G05903) and  
18 Zm00001d013063 (GRMZM2G123063) we screened a Mutator insertion mutant population  
19 generated by Biogemma, an Ac/Ds mutant population (1) and an UniformMu mutant population  
20 (2). Insertion lines were confirmed by PCR (Supplementary Table S6) and backcrossed to A188  
21 inbred for four generations before analysis.

22

#### 23 **Vector construction and generation of transgenic plants**

24 We generated a MAGO1/2-RNAi vector by subcloning a portion corresponding to position  
25 2151-2400 of Zm00001d007786 (GRMZM2G05903) and a fragment corresponding to position  
26 1001-1250 of Zm00001d013063 (GRMZM2G123063) into a pCsVMV::intOsActin-intStLS1-  
27 terSbHSP vector using Golden Gate cloning.

28 To generate a chemically inducible helper component-proteinase (HC-Pro) construct we  
29 synthesized a 2,211 bp fragment from the Wheat Streak Mosaic Virus WSMV containing  
30 Gateway Recombination flanking sequences (Invitrogen, USA). The synthetic fragment was  
31 subcloned into a two-component dexamethasone-inducible expression binary vector named pZZ-  
32 TOP, which is derived from pTF101.1 and carries a LhG4:GR synthetic gene fusion and a bi-

33 directional pOp6 promoter (3). This vector enables the co-expression of a Beta-Glucuronidase  
34 (GUS) reporter and HC-Pro after exposure to 20mM Dexamethasone (DEX).

35 To enable the epidermal expression of HC-Pro, we generated a pZmHDZIV6-LhG4 vector using  
36 MultiSite Gateway Recombination (Invitrogen, USA). The native 3164 bp promoter and the 945  
37 bp native terminator of Zm00001d002234 (GRMZM2G001289) was cloned into pDONR221 P1-  
38 P4 and pDONR221 P3-P2, respectively. The maize codon-optimized LhG4 was cloned into  
39 pDONR221 P4r-P3r. The resulting three entry vectors were then recombined into the binary  
40 vector pAL010, a derivative of pTF101.1 carrying a Gateway Recombination Cassette and a bi-  
41 directional pOp6 promoter enabling the co-expression of a Beta-Glucuronidase (GUS) and NLS-  
42 tdTomato reporters. All constructs were fully sequenced before transformation in maize using  
43 *Agrobacterium tumefaciens* strains LBA4404 (MAGO1/2-RNAi and pZmHDZIV6-LhG4) or  
44 EHA101 (HC-Pro).

45 To determine the in vivo activity of MAGO proteins we generated a firefly Luciferase silencing  
46 reporter system. First, we generated a construct containing a nopaline synthase (NOS) promoter  
47 (pNOS), a firefly luciferase (FLUC) fused to four miR2118-target sequences (PHAS), a  
48 truncated-GFP ( $\Delta$ GFP) and a NOS terminator (tNOS). This synthetic fragment was cloned in  
49 pBINPLUS using *Hind*III and *Bam*HI restriction enzyme digestion. The miR2118 target region  
50 was designed to have optimal hybridization energies with the RNA target. The resulting  
51 construct was digested with *Sma*I and *Eco*RI to enable the insertion of a p35S::GUS:tNOS  
52 fragment derived from the pSLJ4J8 vector. We also generated a fragment containing the  
53 octopine synthase (OCS) promoter, an artificial miRNA based on maize miR2118c (amiR2118)  
54 and a nopaline synthase (NOS) terminator. This fragment was cloned into pBINPLUS using *Asc*I  
55 restriction enzyme digestion. To simultaneously express MAGO and amiR2118, we generated  
56 codon-optimized MAGO1 and 2, containing a FLAG tag in the carboxy-terminal end, which  
57 were cloned into pCsVMV::intOsActin-terSbHSP using *Sap*I resulting in the binary vectors  
58 pBIOS11743 and pBIOS11746, respectively. For the phosphorylation study, we generated  
59 codon-optimized MAGO2 phosphomimetic (S>E) and phosphoresistant (S>A) forms, containing  
60 a FLAG tag at the carboxy end, which were cloned into pCsVMV::intOsActin-terSbHSP using  
61 *Sap*I resulting in the binary vectors pBIOS11747 and pBIOS11748, respectively. MAGO2  
62 mutants for sRNA binding (Y676E) and cleavage (D835E) were generated using Q5® Site-  
63 Directed Mutagenesis Kit (NEB, UK). The pOCS::amiR2118:tNOS was sub-cloned into

64 pBIOS11743 and pBIOS11746 using AscI restriction enzyme digestion. Generated constructs  
65 were fully sequenced and transformed in *Nicotiana benthamiana* using *Agrobacterium*  
66 *tumefaciens* GV3101.

67 To study the in vivo localization of MAGO proteins, codon-optimised coding regions for each  
68 gene were subcloned in pGWB441 (4) to generate c-terminal EYFP protein fusion after Gateway  
69 Recombination (Invitrogen, USA). All constructs generated in this study were fully sequenced  
70 and transformed in *Nicotiana benthamiana* using *Agrobacterium tumefaciens* GV3101.

71

### 72 **Collection of maize meiocytes**

73 The meiotic stage of anthers was determined using acetocarmine staining. Meiocytes were  
74 isolated by manual micromanipulation in RNase-free PBS and collected using microglass  
75 pipettes controlled by UMP3 UltraMicroPump (WPI). Collected meiocytes were directly frozen  
76 in liquid nitrogen and stored at -80°C.

77

### 78 **Antisera preparation and immunopurification**

79 Polyclonal antisera were raised in rabbit against synthetic peptides for MAGO1  
80 (VETE HQGKR SIYRI) or MAGO2 (CVAAREGPVEVRQLPK) (Eurogentec, Liege, BE). To  
81 generate HC-Pro antisera, a partial DNA fragment was chemically synthesized (Integrated DNA  
82 Technology, UK) and cloned in pET29a (Novagen, Merck, Darmstadt, Germany). A soluble  
83 fraction of HC-Pro was isolated and purified by metal affinity chromatography and polyclonal  
84 antiserum was raised in rabbit (Eurogentec, Liege, BE). All antisera were affinity purified using  
85 a Sulpholink coupling gel system (Pierce, Rockford, IL).

86

### 87 **MAGO immunoprecipitation**

88 For immunoprecipitation, maize anthers were isolated by micromanipulation and ground in  
89 extraction buffer (20 mM Tris-Cl pH 7.5, 300 mM NaCl, 5 mM MgCl<sub>2</sub>, 5 mM DTT, 1% (v/v)  
90 cOmplete EDTA-free protease inhibitor cocktail (Merck, Darmstadt, Germany). The lysates  
91 were pre-cleared with protein-A agarose beads (Sigma-Aldrich, Poole, UK) and incubated with  
92 anti-MAGO1 (1:200), anti-MAGO2 (1:200) or anti-HC-Pro (1:100) antibodies for 2h at 4°C.  
93 Protein-A agarose beads were added to the sample and incubated for a further 2h. Subsequently,  
94 the beads were washed 4-5 times using extraction buffer supplemented with 0.5% NP-40 (Sigma,

95 St. Louis, MO). For western blot analysis, beads were suspended in 1x SDS loading buffer and  
96 heated at 95°C. For isolation of small RNA, the bead slurry was digested with proteinase K (100  
97 µg·mL<sup>-1</sup>) and incubated for 1 h at 37°C prior to RNA extraction using TRIZOL® Reagent  
98 (Invitrogen, UK).

99

## 100 **RNA extraction**

101 Total RNAs were extracted from immature tassels, anthers, meiocytes or leaves with TRIzol®  
102 Reagent (Invitrogen, UK) as per manufacturer's instruction. RNAs for sequencing were  
103 extracted using Direct-zol RNA miniprep kit (ZYMO Research, Cambridge). The extracted  
104 RNAs were quantified using Nanodrop (ThermoFisher, UK) and the quality checked with a  
105 Bioanalyzer 2100 (Agilent, UK).

106

## 107 **Preparation of RNA libraries and sequencing analysis**

108 To isolate small RNAs (sRNAs), total RNA was fractionated on a 15% polyacrylamide TBE-  
109 Urea gel (Novex, UK). The gel was stained with ethidium bromide for 5 mins at room  
110 temperature and visualised with a UV illuminator. Gel pieces were macerated by incubation with  
111 300 mM NaCl overnight followed by RNA precipitation. For sRNA sequencing, fractionated  
112 sRNAs were used to construct libraries using the TruSeq Small RNA Sample Preparation Kit  
113 (Illumina, UK) and sequenced in single-end 50 base mode on an Illumina HiSeq platform  
114 (University of Delaware). For total RNA sequencing, total RNAs with RNA integrity number  
115 (RIN) >8.0 were used for library construction using a TruSeq RNA Sample Preparation Kit  
116 (Illumina, UK) and sequenced in single-end 150 base mode on an Illumina NexSeq platform  
117 (University of Warwick). NanoPARE libraries were prepared as described previously (Schon et  
118 al. 2018). Briefly, cDNA libraries were generated from 5 ng of total RNA using the original  
119 Smart-seq2 protocol (Picelli et al. 2013). Five nanograms of cDNA was tagmented using Nextera  
120 DNA Flex library preparation kit as described in the manufacture instructions. Tagmented cDNA  
121 was purified using Zymo DNA Clean and Concentrator kit and eluted with 20ul nuclease-free  
122 water. This purified tagmented product was split into halves and used as a substrate for final  
123 enrichment PCR with either Tn5.1/TSO or Tn5.2/TSO oligonucleotide primer sets (Schon et al.  
124 2018). PCR reaction products from Tn5.1/TSO and Tn5.2/TSO oligonucleotide primer sets were  
125 pooled together and purified using Beckman Coulter AMPureXP DNA beads. The nanoPARE

126 libraries were sequenced in single-end 50 base mode on an Illumina Hi-Seq 2500 instrument.  
127 Library details and number of reads are provided in Table S7.

128

### 129 **Induction of HC-Pro in developing anthers**

130 Maize HC-Pro transgenic plants were grown to adult stage and whorls were cut open to reveal  
131 the developing male inflorescence (tassels). Each floret was filled with a DEX solution (50  $\mu$ M  
132 DEX, 0.1% Silwet-77) and allowed to grow to maturity under normal growth conditions. To  
133 determine the efficiency of DEX-induction, anthers were submerged in GUS solution (50 mM  
134 sodium phosphate, 1 mM potassium ferricyanide, 1 mM potassium ferrocyanide, 0.1% Triton X-  
135 100, 10 mM EDTA, 1.0 mg·mL<sup>-1</sup> 5-Bromo-4-chloro-3-indolyl- $\beta$ -d-glucuronic acid), incubated  
136 at 37°C for 16-24 h until blue precipitate was observed. DEX--treated and mock-treated anthers  
137 were sampled to determine pollen viability. To check induction of HC-Pro, total protein was  
138 extracted from anthers using QB buffer (100 mM KPO<sub>4</sub> (pH 7.8), 1 mM EDTA, 1% Triton X-  
139 100, 10% glycerol, 1 mM DTT, Protease inhibitor cocktail (Roche, UK). The extracted proteins  
140 were quantified by Quick Strat Bradford Protein Assay (Bio-Rad, UK). Western blot detection  
141 was carried out with immunopurified anti-HC-Pro antisera and images recorded using an  
142 ImageQuant gel documentation instrument (GE Healthcare Life Sciences, UK).

143

### 144 **Confocal microscopy analysis**

145 To determine transcriptional activation of pZmHDZIV6::LhG4 in anther epidermis, transgenic  
146 plants were grown to reproductive stage and tassels were fixed in SR2200 solution (4% PFA in  
147 PBS (pH 7.4), 0.1% SR2000 (Renaissance Chemicals)), vacuum infiltrated, washed with PBS  
148 and submerged in ClearSee solution (10% xylitol (w/v), 15% sodium deoxycholate (w/v), 25%  
149 urea (w/v) (Kurihara et al. 2015). The samples were vacuum infiltrated, incubated until tassels  
150 were cleared, washed and stored in PBS. The cleared tissue was embedded in 4% low melting  
151 agarose in PBS and the embedded tissue was mounted onto vibratome blocks, 150  $\mu$ m sections  
152 were cut by Lancer Vibratome Series 1000 (TPI, USA). Tissue slices were placed onto glass  
153 slides, covered with a coverslip and imaged with a LSM710 confocal microscope (Zeiss, Jena,  
154 GE).

155

### 156 **cDNA synthesis and RT-PCR**

157 Total RNA was treated with Ambion® TURBO DNase kit (Life technologies, USA). DNase-  
158 treated RNAs were used for cDNA synthesis using Superscript® reverse transcriptase II  
159 (Invitrogen, UK). Semi-quantitative RT-PCR was performed using templates as the synthesized  
160 cDNAs. GAPDH was used for data normalization. For Quantitative real-time RT-PCR (qRT-  
161 PCR) the optimal number of cycles was determined for each gene. PCR cycling conditions  
162 included denaturing at 95°C for 15 s, annealing at 57°C for 30 s and extension at 72°C for 45,  
163 using a Bio-rad qRT-PCR machine (BioRad, UK). Changes in expression levels were calculated  
164 via the  $\Delta\Delta C_t$  method. To ensure primer specificity, qRT-PCR was done when the melting curve  
165 showed a single peak. To quantify small RNAs we used stem loop qRT-PCR following  
166 previously reported methods (Yang et al. 2014; Varkonyi-Gasic, 2017) with minor modifications.  
167 Reverse transcription was performed using the RevertAid First Strand cDNA Synthesis Kit  
168 (Thermo Scientific, USA) as per the manufacturer's instructions. For stem loop qRT-PCR, we  
169 used a 10  $\mu$ L of RT reaction mixture containing 1  $\mu$ L of RNA, 1  $\mu$ L of RT primer (5  $\mu$ M) and 1  
170  $\mu$ L of U6 RT primer (5  $\mu$ M), 1  $\mu$ L of 10 mM dNTP Mix, 2  $\mu$ L of reaction buffer, 0.5  $\mu$ L of  
171 Ribolock RNase inhibitor (20 U/ $\mu$ L), 0.5  $\mu$ L revertAid M-MuLV Reverse Transcriptase (200  
172 U/ $\mu$ L). The mixture was incubated at 25°C for 5 min, and then incubation was continued at 42°C  
173 for 60 min. The reaction was inactivated by heating at 70°C for 5 min and to which 1  $\mu$ L of RT  
174 product, 5  $\mu$ L of SYBR Green real-time PCR Master Mix, and 1  $\mu$ L of primer (forward and  
175 reverse, 1  $\mu$ M each) was added. Reactions were incubated in a PCR cycler at 95°C for 3 min,  
176 followed by 40 cycles of 95°C for 5 s, 62°C for 35 s. Primer sequences are listed in  
177 Supplementary Table S6.

178

### 179 **Display and high-throughput sequencing of retrotransposon insertions**

180 For the detection of retrotransposon insertions, we used Splinkerette PCR (5). Genomic DNA  
181 was isolated from leaves using a urea gDNA extraction method (6). Genomic DNA was digested  
182 by *Bst*I (NEB) overnight and cleaned with a MinElute DNA clean-up kit (Qiagen). End repair  
183 was carried out by incubating overnight with T4 DNA polymerase (NEB) followed by A-tailing  
184 before clean-up with a MinElute DNA cleanup kit (Qiagen). To generate the Splinkerette adapter,  
185 Long-strand adaptor and Short-strand adaptor oligos were synthesised and annealed by heating  
186 for 10 mins at 72°C and allow them to cool at room temperature. Fragmented DNA was ligated  
187 to a Splinkerette adapter by T4 ligase (NEB) followed by clean-up with MinElute DNA cleanup

188 kit (Qiagen). Ligated genomic DNA was then used for two rounds of nested PCR with Phusion  
189 High-Fidelity Polymerase (NEB). Splink1 primer and retrotransposon-specific round-1 primer  
190 was used for the first round of PCR. This PCR product was used as template for the second PCR  
191 with Splink2 primer and retrotransposon-specific round 2 primers. Each PCR product was  
192 resolved on a 6% Acrylamide gel and stained with ethidium bromide before imaging.

193 For the high-throughput sequencing to identify and map retroelement insertion sites we followed  
194 the method developed by Dooner, Wang, Huang, Li, He, Xiong and Du (7) with minor  
195 modifications. An equal amount of young leaf-tissue was harvested from 10 plants and DNA was  
196 extracted by the Urea method. A modified Splinkerette-PCR was used to isolate the retroelement  
197 insertion sites. DNA was sheared using a Bioruptor sonication system (Diagenode, Belgium) to a  
198 mean size of ~1.7-kb and size-selected by 0.8xAgencourt AMPure XP beads (Beckman Coulter,  
199 Brea, CA). The protocol of KAPA library preparation Kits (Kapa Biosystems Inc., Wilmington,  
200 MA) was followed in subsequent end-repairing, A-tailing and adaptor-ligation procedures. PCR  
201 amplifications followed the protocol of Phusion High-Fidelity Polymerase (NEB, Ipswich, MA).  
202 Biotin-Splink1 primers were used for 1st round PCR using Phusion High-Fidelity Polymerase  
203 (NEB, Ipswich, MA) and the PCR product was purified using Dynabeads® M-280 Streptavidin  
204 (Thermo Fisher Scientific, Carlsbad, CA). These purified products were used as template for  
205 second PCR using primers for different retroelements that were barcoded to allow sample  
206 multiplexing. The oligonucleotides required for Splinkerette-PCR are listed in Supplementary  
207 Table S6. We constructed sequencing libraries, after amplicons were end-repaired, A-tailed, and  
208 ligated to Illumina TruSeq Single Index Barcoded adaptors from the Illumina TruSeq LT DNA  
209 kit (Illumina, Kapa Biosciences). Adaptor-ligated DNA was amplified in a PCR reaction with 1X  
210 Kapa HF PCR Master Mix (Kapa Biosciences), and 1X TruSeq PCR Primer Cocktail (Illumina).  
211 Libraries were sequenced on an Illumina NextSeq platform (University of Warwick). Primer  
212 sequences are listed in Supplementary Table S6. Library details and number of reads are  
213 provided in Table S7.

214

### 215 **Sequencing data and statistics analyses**

216 Analyses of small RNA sequencing data were carried out using previously described methods (8).  
217 Mapping of small RNAs to AGPv4 reference genome was performed using Bowtie. Any read  
218 with more than 50 perfect matches (“hits”) to the genome was excluded from further analysis.

219 Abundances of small RNAs in each library were normalized to “TP10M” (transcripts per 10  
220 million) based on the total count of genome-matched reads in that library. For the analysis of  
221 RNA-seq data, reads were trimmed and mapped to AGPv4 reference genome using TopHat2 (9)  
222 and the expression annotated genes and transposons was quantified using TETranscripts (10). For  
223 the analysis of NanoPARE sequencing data, we used a described analysis pipeline and  
224 determined candidates for sRNA-mediated cleavage of retrotransposons using EndCut (11).

225

### 226 **Phosphoproteomic analysis**

227 Protein from anthers were extracted by adding three times the volume of extraction buffer (50  
228 mM HEPES, 150 mM NaCl, 1 mM EDTA, 20 mM NaF, 1 mM Na<sub>2</sub>MoO<sub>4</sub>, 1% (v/v) SDS, 1 mM  
229 PMSF, 2 μM Calyculin A, 1 mM NaVO<sub>4</sub>, 1 mM DTT, Protease inhibitor cocktail (Roche)) to  
230 0.5 g of tissue. After 30 min the samples were spun for 15 min at 4,000 g (4°C) to remove debris.  
231 The supernatant was transferred to a new tube, centrifuged for 30 min at 16,000 g (4°C),  
232 transferred to a new tube and treated using the FASP protocol (12). Samples were loaded on  
233 Amicon® Ultra-2 mL Centrifugal Filters with a cutoff of 3 kDa and diluted with 1 ml 8 M urea  
234 until 1 ml of buffer was passed through the column. Reduction and alkylation of the cysteine  
235 residues was carried out by adding a combination of 5 mM tris (2-carboxyethyl) phosphine  
236 (TCEP) and 10 mM iodoacetamide (IAA) for 30 min at room temperature in the dark, followed  
237 by six washes with 25 mM Hepes (pH 7.5). The protein was digested with trypsin (Promega  
238 Trypsin Gold, mass spectrometry grade) overnight at 37 °C at an enzyme-to-substrate ratio of  
239 1:100 (w:w). After digestion the peptides were suspended in 80% acetonitrile (AcN), 5%  
240 trifluoroacetic acid (TFA) and the insoluble matter was spun down at 4000 g for 10 min. The  
241 supernatant was used for the enrichment of phosphopeptides as previously described with minor  
242 modifications (13). The peptide concentration was measured with a Qubit™ fluorometer  
243 (Invitrogen) and 1 μg total peptides were used for each sample. The Titansphere TiO<sub>2</sub> 10 μm  
244 beads (GL Sciences Inc.) were equilibrated in a buffer containing 20 mg/mL 2,5-  
245 dihydroxybenzoic acid (DHB), 80% ACN and 5% TFA in a ratio of 10 μl DHBeq per 1 mg  
246 beads for 10 min with gentle shaking at 600 rpm. TiO<sub>2</sub> beads were used in a ratio of 1:2 peptide-  
247 bead ration (w:w). The TiO<sub>2</sub> solution was added to each sample and incubated for 60 min at  
248 room temperature. This step was repeated one more time. The samples were then spun down at  
249 3000 g for 2 min and resuspended in 100 μL Wash buffer I (10% AcN, 5% TFA). The



250 resuspended beads were added to self-made C8-columns. C8-columns were made of 200  $\mu$ L  
251 pipette tips with 2 mm Empore<sup>TM</sup>Octyl C8 (Supelco) discs. The columns were spun down at  
252 2600 g for 2 min, washed with 100  $\mu$ L Wash buffer II (40% AcN, 5% TFA) and 100  $\mu$ L Wash  
253 buffer III (40% AcN, 5% TFA). The peptides were eluted from the TiO<sub>2</sub> beads with 20  $\mu$ L 5%  
254 ammonium hydroxide and subsequently with 20  $\mu$ L 20% ammonium hydroxide in 25% AcN.  
255 Both eluates were pooled, the volume was reduced to 5  $\mu$ L in a centrifugal evaporator (20–30  
256 min) and acidified with 100  $\mu$ L of buffer A (2% AcN, 1% TFA). Samples were desalted with a  
257 self-made C18 column (Empore<sup>TM</sup>Octadecyl C18). C18 were made in the same way as the C8-  
258 columns. Before adding the samples, the C18-columns were activated with 50  $\mu$ L methanol and  
259 washed with 50  $\mu$ L AcN and 50  $\mu$ L buffer A\* (2% AcN, 0.1% TFA). Samples were loaded on  
260 the C18-column and spun at 2000 g for 7 min. The columns were washed with 50  $\mu$ L ethyl  
261 acetate and 50  $\mu$ L buffer A\* and then eluted consecutively with 20  $\mu$ L 40% AcN and 20  $\mu$ L 60%  
262 AcN. Samples were then vacuum-dried and prior to MS analysis resuspended in 50  $\mu$ L buffer A\*.  
263

#### 264 **Mass spectrometry**

265 Reversed phase chromatography was used to separate tryptic peptides prior to mass  
266 spectrometric analysis. Two columns were utilised, an Acclaim PepMap  $\mu$ -precolumm cartridge  
267 300  $\mu$ m i.d. x 5 mm 5  $\mu$ m 100 Å and an Acclaim PepMap RSLC 75  $\mu$ m x 25 cm 2  $\mu$ m 100 Å  
268 (Thermo Scientific). The columns were installed on an Ultimate 3000 RSLCnano system  
269 (Dionex). Mobile phase buffer A was composed of 0.1% formic acid in water and mobile phase  
270 B 0.1 % formic acid in acetonitrile. Samples were loaded onto the  $\mu$ -precolumm equilibrated in 2%  
271 aqueous acetonitrile containing 0.1% trifluoroacetic acid for 8 min at 10  $\mu$ L min<sup>-1</sup> after which  
272 peptides were eluted onto the analytical column at 300 nL min<sup>-1</sup> by increasing the mobile phase  
273 B concentration from 3% B to 35% over 40 min and then to 90% B over 4 min, followed by a 15  
274 min re-equilibration at 3% B.

275 Eluting peptides were converted to gas-phase ions by means of electrospray ionization and  
276 analysed on a Thermo Orbitrap Fusion (Q-OT-qIT, Thermo Scientific). Survey scans of peptide  
277 precursors from 350 to 1500 m/z were performed at 120K resolution (at 200 m/z) with a 4  $\times$  10<sup>5</sup>  
278 ion count target. Tandem MS was performed by isolation at 1.6 Th using the quadrupole, HCD  
279 fragmentation with normalized collision energy of 35, and rapid scan MS analysis in the ion trap.  
280 The MS<sub>2</sub> ion count target was set to 1x10<sup>4</sup> and the max injection time was 200 ms. Precursors

281 with charge state 2–7 were selected and sampled for MS2. The dynamic exclusion duration was  
282 set to 45 s with a 10ppm tolerance around the selected precursor and its isotopes. Monoisotopic  
283 precursor selection was turned on. The instrument was run in top speed mode with 2 s cycles.

284

### 285 **Mass spectrometry data analysis**

286 A label-free peptide relative quantification analysis was performed in Progenesis QI for  
287 Proteomics (Nonlinear Dynamics, Durham). To identify peptides, peak lists were created by  
288 using Progenesis QI. The raw data was searched against maize B73 RefGen\_4 Working Gene set.  
289 Peptides were generated from a tryptic digestion with up to two missed cleavages,  
290 carbamidomethylation of cysteines as fixed modifications, oxidation of methionine and  
291 phosphorylation of serine, threonine and tyrosine as variable modifications. Precursor mass  
292 tolerance was 5 ppm and product ions were searched at 0.8 Da tolerances. Scaffold (TM, version  
293 4.4.5, Proteome Software Inc.) was used to validate MS/MS based peptide and protein  
294 identifications. Peptide identifications were accepted if they could be established at greater than  
295 95.0% probability by the Scaffold Local FDR algorithm. Protein identifications were accepted if  
296 they could be established at greater than 99.0% probability and contained at least one identified  
297 peptide. Proteins that contained similar peptides and could not be differentiated based on  
298 MS/MS analysis alone were grouped to satisfy the principles of parsimony. List of differentially  
299 accumulated phosphopeptides are listed in Table S4.

300

### 301 **Protein structure modelling**

302 To model the conserved catalytic domain of MAGO2, we used MODELLER (14). First, we  
303 scanned the PDB database (<http://www.rcsb.org/>) to identify proteins with known structure  
304 whose sequences could be best aligned with that of MAGO2. This search identified the *K.*  
305 *polysporus* Argonaute (PDB ID 4F1N) (15) as a good match for roughly the last two thirds of the  
306 MAGO2 sequence. Moreover, three other proteins, namely the human Argonaute1-3, were found  
307 to be viable templates covering the rest of the MAGO2 sequence, with varying degree of overlap  
308 with KpAGO. Of these, we chose the Argonaute 2, because of the high resolution and  
309 crystallographic quality of one of its available structures (PDB ID 4Z4D) (16). To use both  
310 structure as templates for our modelling, we first aligned them to each other, and then aligned the  
311 fitted structures to the sequence of MAGO2. We then used this multiple-template alignment to

312 produce 64 base models of MAGO2, refining the loop regions in each of them twice. Each  
313 refinement was repeated 16 independent times, resulting in a total of 1,024 different models. To  
314 find the best one, we assessed each model using a high-resolution version of the DOPE (Discrete  
315 Optimized Protein Energy) method (17), and picked the model with the best score, checking it by  
316 hand to ensure it contained no knotted loops or other unphysical structures.

317

318 Having produced an initial model, we refined it using molecular dynamics (MD) simulations, to  
319 obtain a realistic final structure. All MD simulations were carried out using Amber18 (18). To  
320 prepare the parameters for the simulations, we first added hydrogens to the pdb file of the model  
321 using the pdb4amber and reduce programs (19). To ensure the model was properly folded, we  
322 decided to run an initial relaxation simulation using implicit solvation, to exploit the speed-up in  
323 conformational sampling that this method provides. More specifically, we used the Generalized  
324 Born model (20) with a set of optimized atomic parameters for proteins (21). Thus, to create the  
325 topology parameters, we used the ff14SBonlysc force field, which uses the same parameters as  
326 the ff99SB force field (22) for the backbone, but full quantum-mechanics ones for the side-  
327 chains (23), and which is known to work best in this setup.

328 We then minimized the structure with 16000 steps of steepest descent, before heating the system  
329 gradually over 0.5 ns from 0 K to 295.15 K, using a Langevin thermostat with collision  
330 frequency of 2.0 ps<sup>-1</sup>. For this and subsequent implicit-solvation steps we constrained the length  
331 of the bonds with hydrogens using SHAKE (24), imposed a cutoff for nonbonded pair and  
332 effective Born radii calculations of 24 Å, and used an integration step of 2 fs. Also, forces  
333 involving the derivatives with respect to the effective Born radii were computed every 2  
334 integration steps. After heating the system, it was allowed to relax at constant temperature, and  
335 computed the total potential energy and its individual contributions (bond energy, dihedral angle  
336 energy, van der Waals 1-4 interaction energy, electrostatic 1-4 energy, total van der Waals  
337 interaction energy and total electrostatic energy). We stopped the relaxation when we observed at  
338 least 20 ns of stability in each of the components, as well as in the total potential energy, which  
339 we took as an indicator that no further conformational changes were likely to occur (25).

340 To obtain a more realistic model we then performed one more relaxation in explicit solvent. We  
341 prepared the starting topology from the last simulation frame of the previous step using the same  
342 procedure described above. However, this time we solvated the protein using the TIP3P water

343 model (26) in a truncated octahedral box imposing a minimum distance between the edges of the  
344 box and the atoms of the protein of 8 Å. Also, for this simulation step we used the full ff14SB  
345 force field (23), as the current gold-standard for simulations with explicit water molecules, and  
346 neutralized the charge of the protein adding 16 Cl<sup>-</sup> ions, treated via the parameters by Joung and  
347 Cheatham (27, 28). We then found the optimal distribution of water molecules by constraining  
348 the protein atoms via a harmonic potential with a coupling constant of 500 kcal/(mol Å<sup>2</sup>) and  
349 minimizing the potential energy of the system. Subsequently, we removed the constraints and  
350 minimized the whole system again, allowing every atom to move. For both minimization steps  
351 we used steepest descent and stopped the minimization process when the root-mean-square of  
352 the components of the potential energy gradient became smaller than 0.05 kcal/(mol Å<sup>2</sup>). For  
353 this and all other explicit-solvation steps, we used a nonbonded interaction cutoff of 8 Å,  
354 constrained the hydrogen-involving bonds using SHAKE, used an integration step of 2 fs, and  
355 evaluated slowly-varying terms in the force field at every step.

356 Having obtained a minimized structure, we heated it using the same protocol described above.  
357 Then, we equilibrated the system at a constant temperature and constant pressure of 1 bar for 4.5  
358 ns using a Monte Carlo barostat with pressure relaxation time of 1.0 ps and attempting a volume-  
359 change move every 100 integration steps. Finally, we relaxed the system with the same protocol  
360 as above, before annealing it to 0 K by decreasing the temperature gradually over 5 ns and  
361 minimizing the resulting structure.

362 To produce a model for the phosphorylated MAGO2 protein, we started from the final non-  
363 phosphorylated structure we obtained. We then mutated the relevant residues to their  
364 phosphorylated versions, and produced a topology for MD simulations. Since we started this step  
365 from an already realistic model of the protein, we had no need to perform an implicit-solvation  
366 step before passing to an explicit-solvent simulation. Thus, the protocol we used is the same as  
367 the one described above for the explicit-solvation case, with the key changes that we used the  
368 phosaa10 force field for the phosphorylated residues (29, 30), and the ff99SB for the rest of the  
369 protein. This last choice was due to the fact that phosaa10 uses the same assumptions as ff99SB.  
370 Thus, its use would not be compatible with force fields of the ff14SB family. Also note that due  
371 to the extra negative charges of the phosphoryl groups, only 8 chlorine counter-ions were needed  
372 to neutralize the total charge of the system. We then produced a relaxed structure of the system  
373 using the exact same steps described previously. To compute the electrostatic potential surfaces,

374 we used PBSA to solve a linearized version of the Poisson-Boltzmann equation, using a level-  
 375 set-function implementation of the dielectric interface, imposing a smooth molecular surface via  
 376 density function calculation (31), and estimating the nonpolar free energy of solvation as the sum  
 377 of a cavity term and a dispersion term. For this calculation, we considered an ionic strength of  
 378 150 mM, a solvent probe radius of 1.4 Å and a solvent-accessible arc resolution of 0.25 Å.

379  
 380 **2. Figures:**  
 381

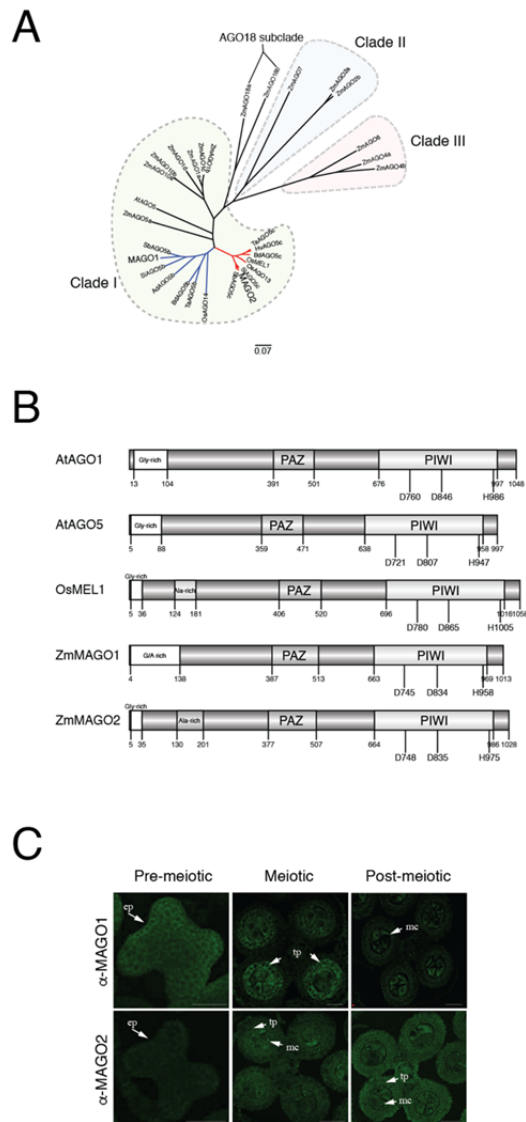

382  
 383 **Fig. S1. Identification of two Male-Associated Argonaute-like (MAGOs) in maize.**  
 384 (A) Distance-based phylogeny tree between MAGOs and other monocotyledonous Argonaute-  
 385 like proteins constructed using the Neighbour-joining method.

386 (B) Schematic diagram showing the conserved domains present in MAGO and related  
387 Argonaute-like proteins. PAZ, Piwi Argonaute and Zwillie domain; PIWI, PIWI domain.  
388 Catalytic amino acid residues (DDH) are indicated.  
389 (C) Immunodetection of MAGO1 and MAGO2 in developing anthers using specific antisera.  
390 White arrow, accumulation of MAGO protein; ep, epidermis; tp, tapetum; mc, meiocyte. Scale  
391 bars are 50  $\mu\text{m}$ .  
392

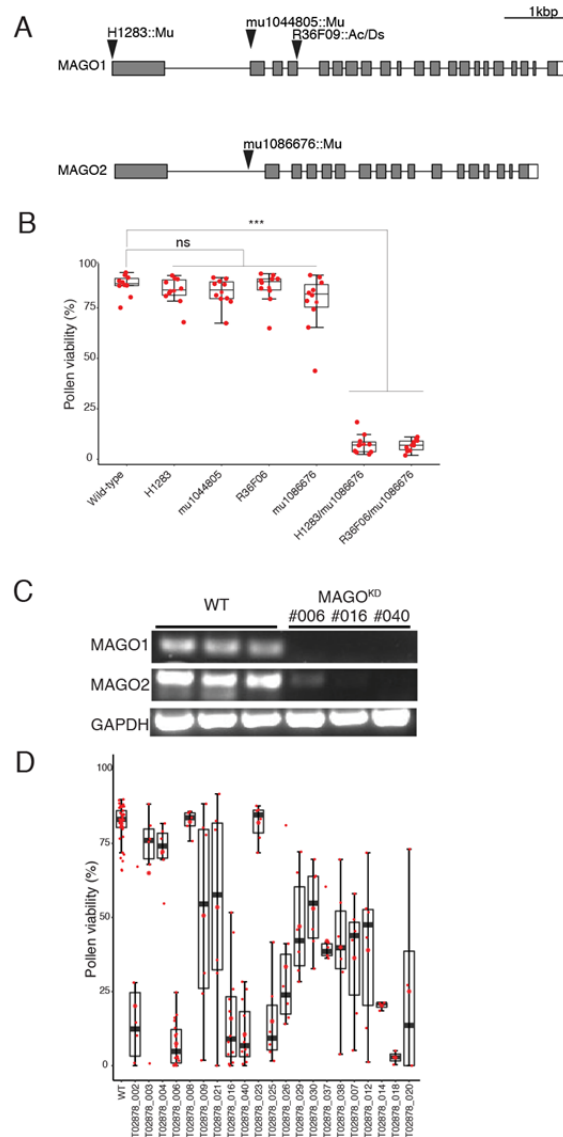

394 **Fig. S2. Identification and characterization of transposon insertions for MAGO1 and**  
 395 **MAGO2 and down-regulation RNAi lines (MAGO<sup>KD</sup>).**  
 396

397 (A) Schematic diagram showing four independent transposon insertion mutant alleles identified  
 398 for MAGO1 and MAGO2. Black arrowhead, transposon insertion; Grey box, exon; White box,  
 399 untranslated region.

400 (B) Pollen viability in wild-type and homozygous transposon insertion plants grown under field  
 401 conditions. n ≥ 10 independent plants analysed per genotype. Differences between groups were  
 402 determined by Tukey HSD, \*\*\*p < 0.001; n.s. no-significant.

403 (C) Accumulation of MAGO 1 and 2 transcripts in pre-meiotic anthers determined by RT-PCR.  
 404 GAPDH was used as a constitutive control.

405 (D) Pollen viability in field-grown wild-type and 21 independent MAGO<sup>KD</sup> lines. n ≥ 6  
 406 hemizygous T2 plants analysed per genotype; more than 10 anthers analysed per plant. Black  
 407 line, median; Red star, mean.  
 408

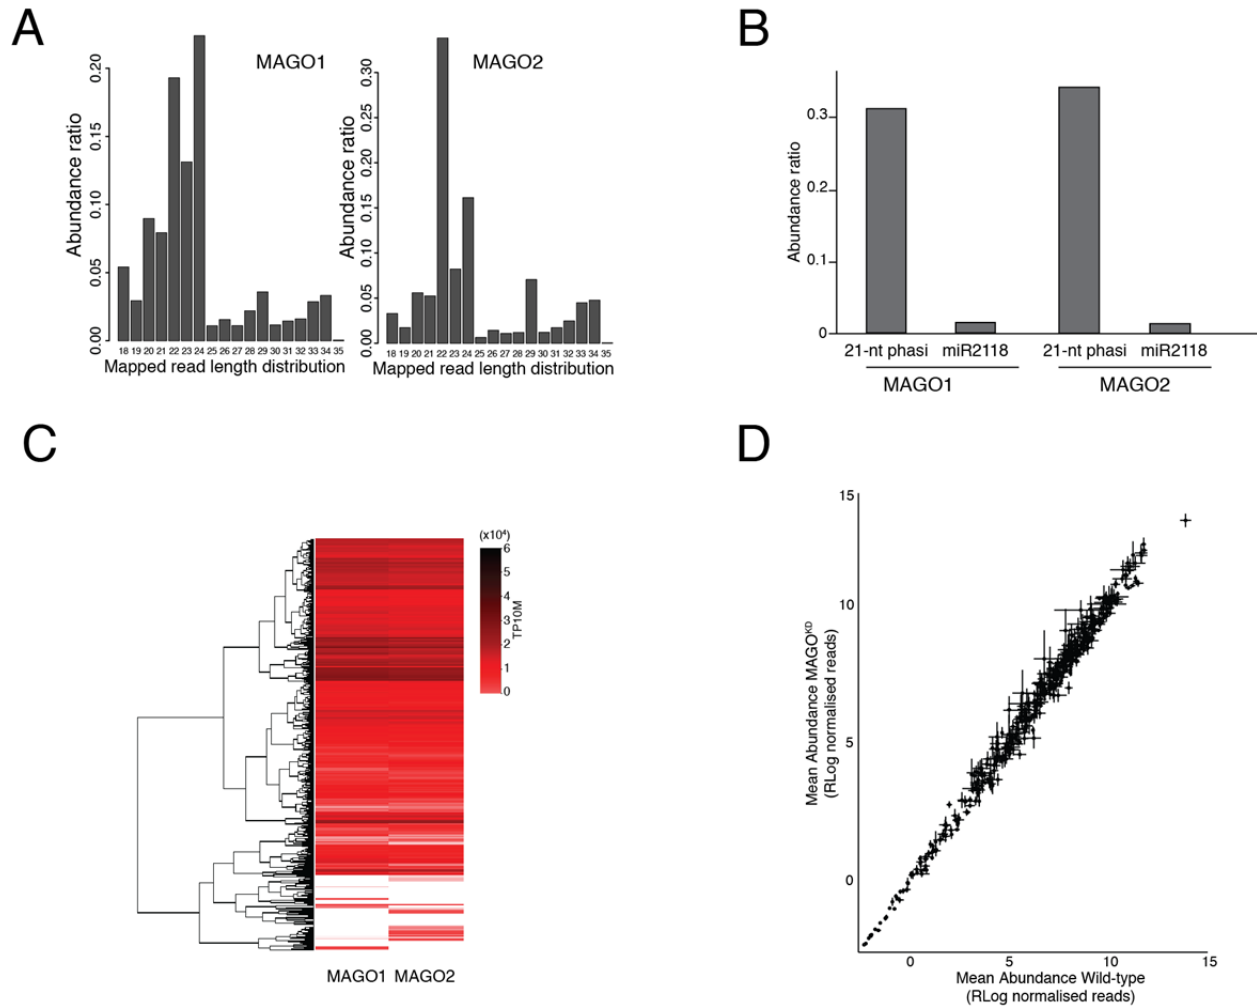

409  
 410  
 411  
 412  
 413  
 414  
 415  
 416  
 417  
 418  
 419  
 420

**Fig. S3. Identification of small RNAs associated with MAGO1 and 2.**

(A) Abundance of different sRNA classes in immunoprecipitated MAGO1 and 2 protein fractions determined by sRNA sequencing. n= 2 independent biological replicates. TP10M, transcript per ten million reads.

(B) Abundance of 21-nt phasiRNA and miR2118 trigger in MAGO1 and MAGO2 immunoprecipitated fractions.

(C) Abundance of different 21-nt phasiRNA classes bound to MAGO1 and 2.

(D) Mean abundance plot of 21-nt phasiRNA in pre-meiotic anthers from wild-type and MAGO<sup>KD</sup> plants. Mean from 3 independent biological replicates; Black line, Standard Deviation.



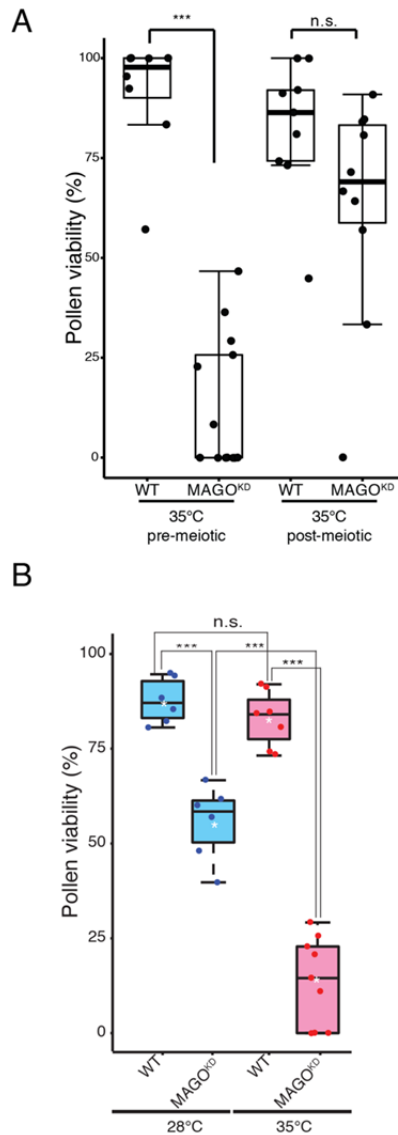

421  
 422  
 423  
 424  
 425  
 426  
 427  
 428  
 429  
 430  
 431  
 432

**Fig. S4. MAGO1 and 2 are required before meiosis to sustain male fertility under heat stress.** (A) Pollen viability in wild-type and MAGO<sup>KD</sup> plants grown under normal conditions (28°C) and subjected to heat stress (72h/35°C) before or after meiosis.  $n \geq 7$  plants, more than 6 anthers per plant analysed. Differences between groups were determined by one-way ANOVA, \*\*\* $p < 0.001$ ; n.s. no-significant. (B) Pollen viability in wild-type and MAGO<sup>KD</sup> plants under normal conditions (28°C) and subjected to heat stress (35°C) before meiosis ( $n = 10$  plants; 10 anthers each). Differences between groups were determined by one-way ANOVA, \*\*\* $p < 0.001$ ; n.s. no-significant. Black line, median; White star, mean.

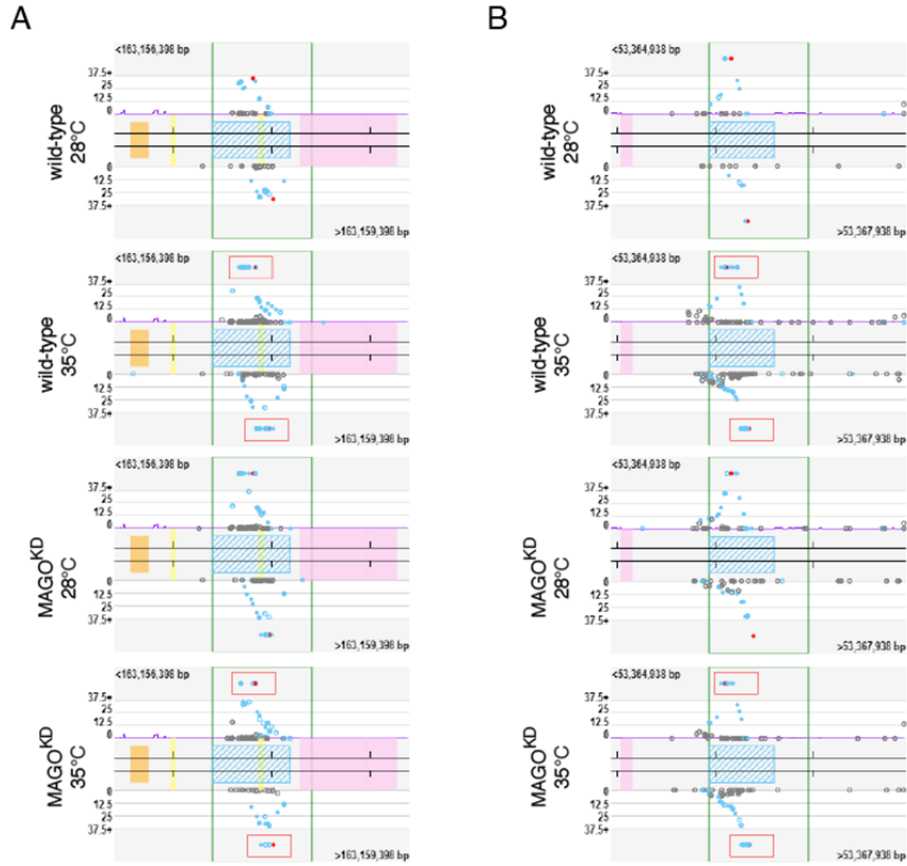

433  
 434  
 435  
 436  
 437  
 438  
 439  
 440  
 441

**Fig. S5. Abundance of heat-induced phasiRNAs (Hphasi) from four PHAS loci in pre-meiotic anthers from wild-type and MAGO<sup>KD</sup> plants grown under normal conditions (28°C) and subjected to heat stress (72h/35°C) before or after meiosis.**  
 (A) Abundance of 21-nt sRNAs in Hphasi\_22 locus. (B) Abundance of 21-nt sRNAs in Hphasi\_123 locus. n = 3 independent biological replicates. Red box, Hphasi generating region; Blue dots, common phasiRNAs; Red dot, unique phasiRNAs.

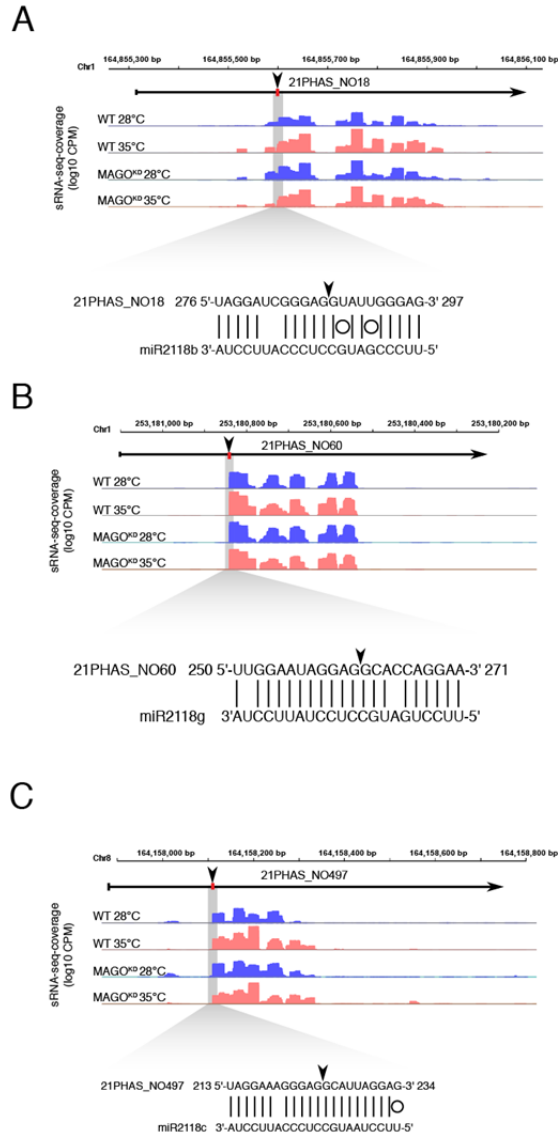

442

443

444 **Fig. S6. Small-RNA-seq coverage of three 21-nt Hphasi generated from miR2118-slicing of**  
 445 **different PHAS precursors in wild-type and MAGO<sup>KD</sup> plants grown under normal**  
 446 **conditions (28°C) and subjected to heat stress (72h/35°C) before or after meiosis. n ≥ 3**  
 447 **independent biological replicates. Black arrowhead and red box indicate the location of predicted**  
 448 **sites for miRNA-directed slicing remnants.**

449

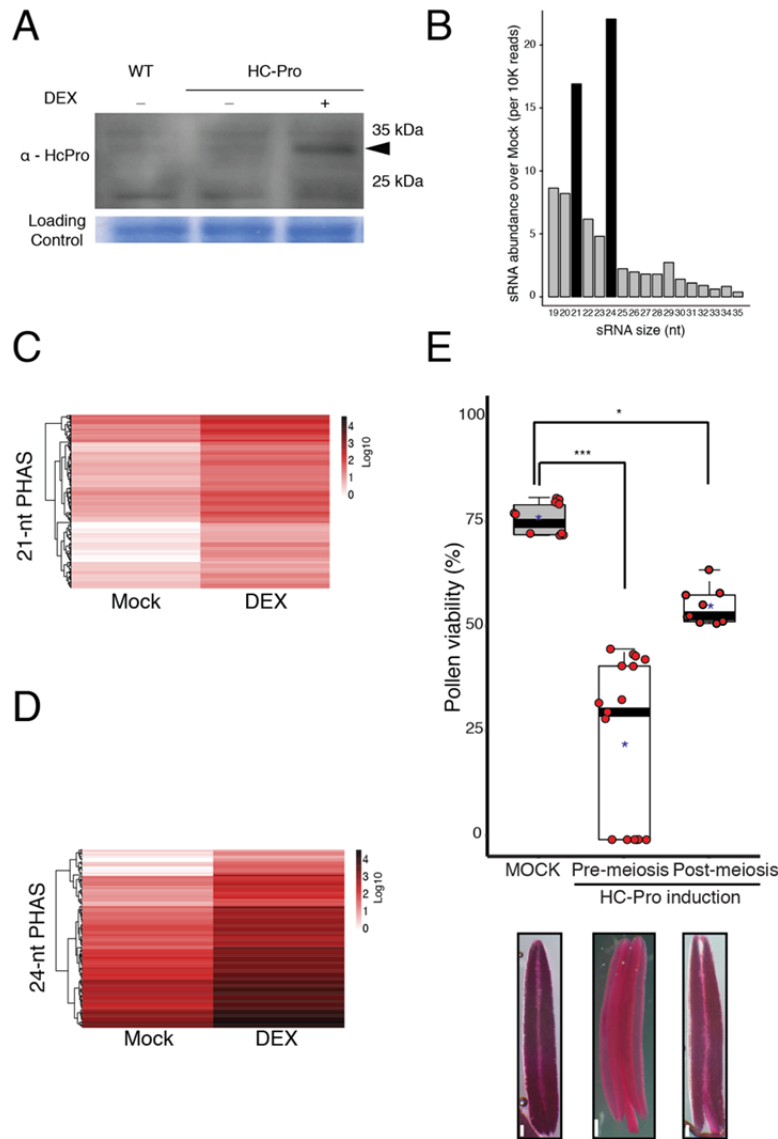

450  
 451  
 452  
 453  
 454  
 455  
 456  
 457  
 458  
 459  
 460  
 461  
 462  
 463  
 464  
 465  
 466

**Fig. S7. Controlled expression of HC-Pro enables the sequestration of small RNAs in maize anthers.**

(A) Western blot detection of HC-Pro accumulation in anthers of wild-type and HC-Pro plants treated with mock and 20  $\mu$ M DEX.

(B) Relative abundance of sRNAs bound to HC-Pro in pre-meiotic anthers determined by immunoprecipitations coupled to sRNA sequencing.  $n=2$  independent biological replicates.

(C) Relative abundance of 21-nt phasiRNAs bound to HC-Pro in anthers and determined by immunoprecipitations coupled to sRNA sequencing.  $n=2$  independent biological replicates.

(D) Relative abundance of 24-nt phasiRNAs bound to HC-Pro in anthers and determined by immunoprecipitations coupled to sRNA sequencing.  $n=2$  independent biological replicates.

(H) Pollen density in anthers from two independent HDZIV6>>HC-Pro lines ( $n \geq 50$  anthers; 10 plants each genotype). Differences between groups were determined by one-way ANOVA,  $***p < 0.001$ . Black line, median; Red star, mean. Below, representative anthers after Alexander's Staining. Scale bars 100  $\mu$ m.

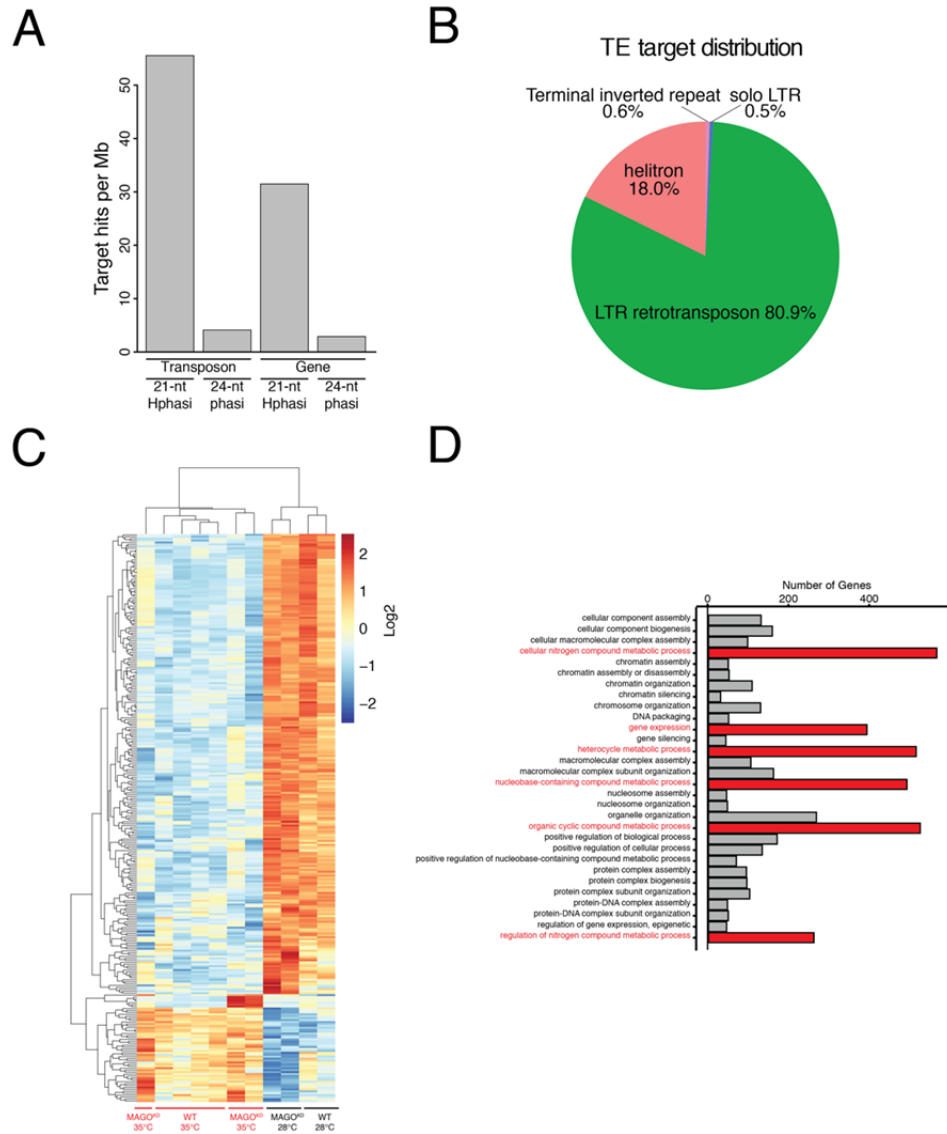

467  
468  
469  
470  
471  
472  
473  
474  
475  
476  
477  
478

**Fig. S8. Predicted targets of 21-nt Hphasi in the maize genome and impact of heat stress in gene expression.**

(A) Distribution of 21-nt HphasiRNA and 24-nt phasiRNA targets according to their genomic location.

(B) Distribution of 21-nt HphasiRNA targets against annotated transposons.

(C) Heatmap showing transcriptional changes in pre-meiotic anthers caused by heat stress (72h/35°C). n ≥ 2 independent biological replicates.

(D) Gene Ontology (GO) analysis showing genes sets enriched within the differentially expressed categories.

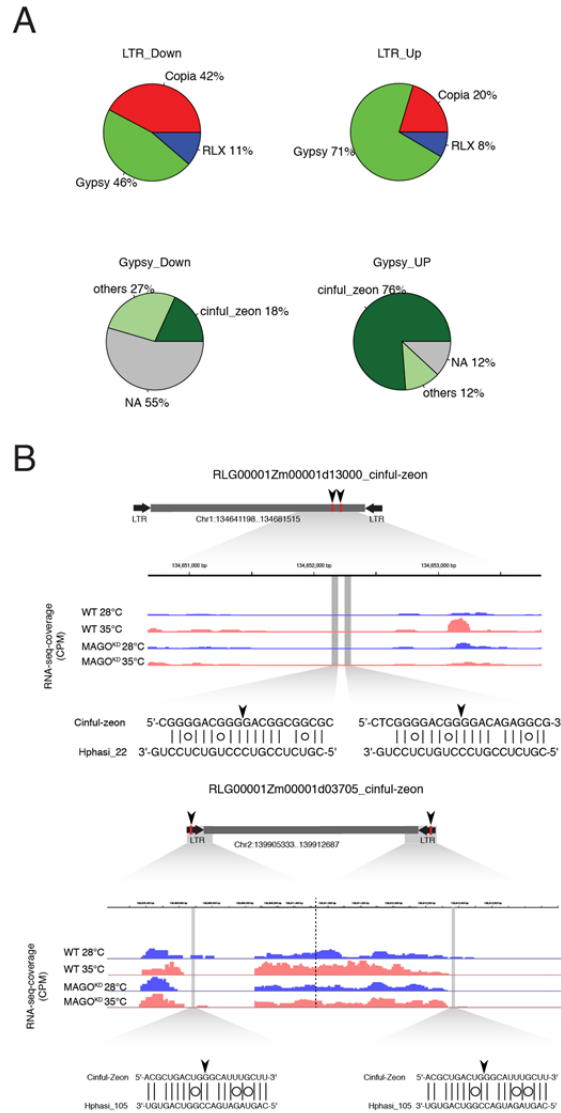

479  
480  
481  
482  
483  
484  
485  
486  
487  
488  
489  
490  
491

**Fig. S9. Deregulation of retrotransposon in MAGO<sup>KD</sup> pre-meiotic anthers after exposure to heat stress.**

(A) Frequency of Gypsy, Copia and RLX retrotransposons de-regulated in pre-meiotic anther of MAGO<sup>KD</sup> plants after exposure to a heat stress (35°C) and frequency of Cinful-zeon and other retrotransposons of the Gypsy-class de-regulated in pre-meiotic anther of MAGO<sup>KD</sup> plants after exposure to a heat stress (35°C).

(B) Coverage of RNA-seq of two different Gypsy-class retrotransposons targeted by Hphasi on anthers of wild-type and MAGO<sup>KD</sup> plants grown under normal conditions (28°C) and subjected to heat stress (72h/35°C) before meiosis.  $n \geq 3$  independent biological replicates. Black arrowhead and red box indicate the location of predicted sites for miRNA-directed slicing remnants.



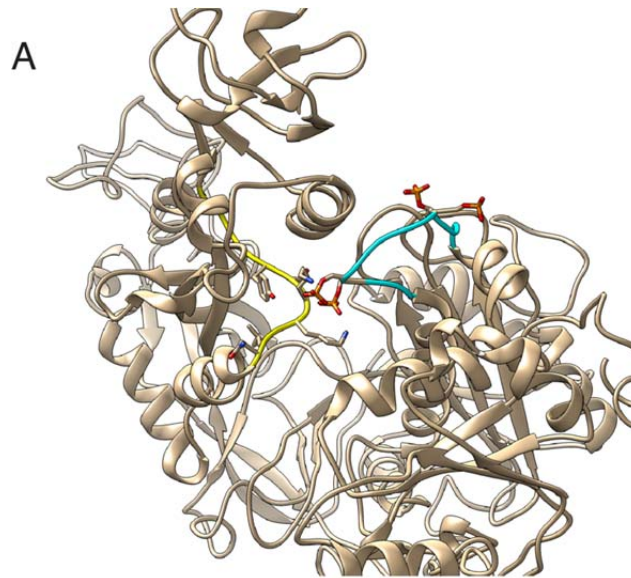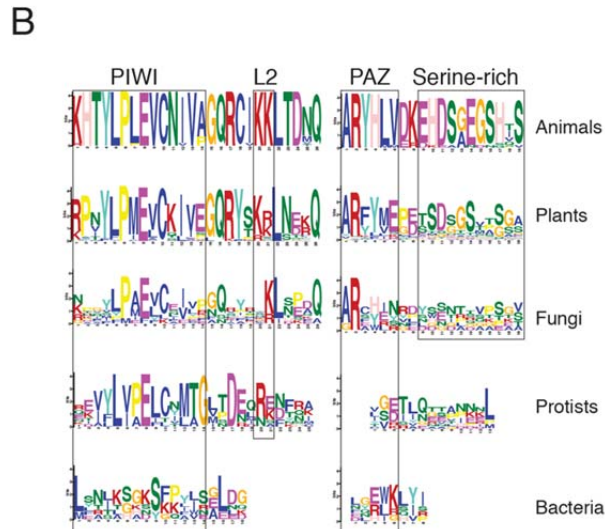

499  
500

501 **Fig. S11. Phosphorylation of conserved serine residues in MAGO2 and other catalytically**  
502 **active argonautes.**

503 (A) Ribbon structure of the PIWI loop and L2 loop of MAGO2 showing the location of  
504 dynamically phosphorylated serine (S989, S990, S994 and S998) residues (red) in the PIWI loop  
505 (blue).

506 (B) Amino acid residues conserved in four protein domains of catalytic argonautes.

507



A

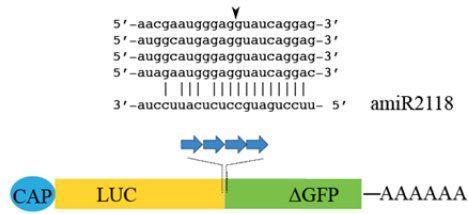

B

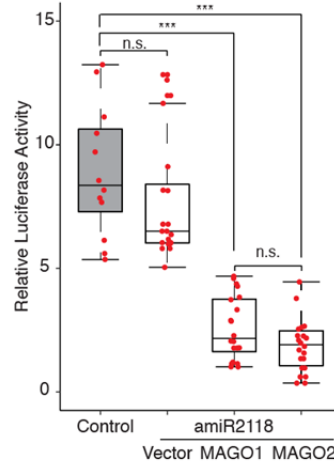

C

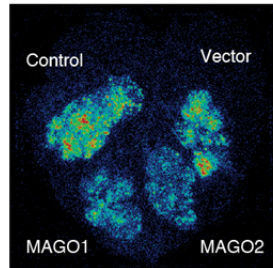

508  
509

510 **Fig. S12. *In vivo* silencing activity of MAGO1/2 assessed in *Nicotiana benthamiana* using a**  
511 **Luciferase-miRNA reporter.**

512 (A) Schematic diagram of the MAGO sensor construct created by inserting four copies of a  
513 miR2118 binding sites in the luciferase (LUC) gene. The predicted cleavage of the target  
514 sequences by amiR2118 is indicated by an arrowhead.

515 (B) Relative luciferase activity in leaves transformed with a control LUC reporter and in  
516 combination with amiR2118 and MAGO1 and 2. n= 10 independent biological replicates.  
517 Differences between groups were determined by one-way ANOVA, \*\*\*p < 0.001; n.s. no-  
518 significant. Black line, median; Red star, mean.

519 (C) Bioluminescent imaging of a representative leaf transformed with the LUC reporter used to  
520 quantify MAGO1 and 2 silencing activity.

521

522  
523  
524  
525  
526  
527  
528  
529  
530  
531  
532  
533  
534  
535  
536  
537  
538  
539  
540  
541  
542

### **3. Tables:**

**Table S1.** List of differentially expressed genes in pre-meiotic anthers from wild-type and MAGO<sup>KD</sup> plants.

**Table S2.** List of predicted LTRs targeted by Hphasi.

**Table S3.** List of new transposon insertions determined by LTR-sequencing.

**Table S4.** List of differentially accumulated phosphopeptides from pre-meiotic anthers of wild-type plants exposed to heat stress.

**Table S5.** Conservation of phosphorylated serine and threonine residues in different Argonaute-like proteins.

**Table S6.** List of oligonucleotides and synthetic DNA constructs.

**Table S7.** Next-Generation-Sequencing library details.

### **4. Multimedia Files:**

**Supplementary Movie. Electrostatic potential distribution on the molecular surface of the central cleft of native and phosphorylated MAGO2.** Charge: negative (red), positive (blue) and hydrophobic (grey) residues.

543 **5. References:**

544

- 545 1. Y. Li, G. Segal, Q. Wang, H. K. Dooner, Gene tagging with engineered Ds elements in  
546 maize. *Methods in Molecular Biology*, (2013).
- 547 2. D. R. McCarty *et al.*, Steady-state transposon mutagenesis in inbred maize. *Plant Journal*,  
548 (2005).
- 549 3. M. Samalova, B. Brzobohaty, I. Moore, pOp6/LhGR: A stringently regulated and highly  
550 responsive dexamethasone-inducible gene expression system for tobacco. *Plant Journal*,  
551 (2005).
- 552 4. T. Nakagawa *et al.*, Improved gateway binary vectors: High-performance vectors for  
553 creation of fusion constructs in transgenic analysis of plants. *Bioscience, Biotechnology  
554 and Biochemistry*, (2007).
- 555 5. A. G. Uren *et al.*, A high-throughput splinkerette-pcr method for the isolation and  
556 sequencing of retroviral insertion sites. *Nature Protocols*, (2009).
- 557 6. J. Chen, S. Dellaporta. (1994).
- 558 7. H. K. Dooner *et al.*, Spontaneous mutations in maize pollen are frequent in some lines  
559 and arise mainly from retrotranspositions and deletions. *Proc Natl Acad Sci U S A* **116**,  
560 10734-10743 (2019).
- 561 8. J. Zhai *et al.*, Spatiotemporally dynamic, cell-type-dependent premeiotic and meiotic  
562 phasiRNAs in maize anthers. *Proceedings of the National Academy of Sciences of the  
563 United States of America*, (2015).
- 564 9. D. Kim *et al.*, TopHat2: Accurate alignment of transcriptomes in the presence of  
565 insertions, deletions and gene fusions. *Genome Biology*, (2013).
- 566 10. Y. Jin, O. H. Tam, E. Paniagua, M. Hammell, TETranscripts: A package for including  
567 transposable elements in differential expression analysis of RNA-seq datasets.  
568 *Bioinformatics*, (2015).
- 569 11. M. A. Schon, M. J. Kellner, A. Plotnikova, F. Hofmann, M. D. Nodine, NanoPARE: Parallel  
570 analysis of RNA 5' ends from low-input RNA. *Genome Research*, (2018).
- 571 12. J. R. Wiśniewski, A. Zougman, N. Nagaraj, M. Mann, Universal sample preparation  
572 method for proteome analysis. *Nature Methods*, (2009).
- 573 13. T. E. Thingholm, T. J. D. Jørgensen, O. N. Jensen, M. R. Larsen, Highly selective  
574 enrichment of phosphorylated peptides using titanium dioxide. *Nature Protocols*,  
575 (2006).
- 576 14. A. Šali, T. L. Blundell, Comparative protein modelling by satisfaction of spatial restraints.  
577 *Journal of Molecular Biology*, (1993).
- 578 15. K. Nakanishi, D. E. Weinberg, D. P. Bartel, D. J. Patel, Structure of yeast Argonaute with  
579 guide RNA. *Nature*, (2012).
- 580 16. N. T. Schirle, J. Sheu-Gruttadauria, S. D. Chandradoss, C. Joo, I. J. MacRae, Water-  
581 mediated recognition of t1-adenosine anchors Argonaute2 to microRNA targets. *eLife*,  
582 (2015).
- 583 17. M.-y. Shen, A. Sali, Statistical potential for assessment and prediction of protein  
584 structures. *Protein Science*, (2006).
- 585 18. D. A. Case, Amber 18. *University of California, San Francisco*, (2018).

- 586 19. J. M. Word, S. C. Lovell, J. S. Richardson, D. C. Richardson, Asparagine and glutamine:  
587 Using hydrogen atom contacts in the choice of side-chain amide orientation. *Journal of*  
588 *Molecular Biology*, (1999).
- 589 20. J. Mongan, C. Simmerling, J. A. McCammon, D. A. Case, A. Onufriev, Generalized born  
590 model with a simple, robust molecular volume correction. *Journal of Chemical Theory*  
591 *and Computation*, (2007).
- 592 21. H. Nguyen, D. R. Roe, C. Simmerling, Improved generalized born solvent model  
593 parameters for protein simulations. *Journal of Chemical Theory and Computation*,  
594 (2013).
- 595 22. V. Hornak *et al.* (2006).
- 596 23. J. A. Maier *et al.*, ff14SB: Improving the Accuracy of Protein Side Chain and Backbone  
597 Parameters from ff99SB. *Journal of Chemical Theory and Computation*, (2015).
- 598 24. J. P. Ryckaert, G. Ciccotti, H. J. C. Berendsen, Numerical integration of the cartesian  
599 equations of motion of a system with constraints: molecular dynamics of n-alkanes.  
600 *Journal of Computational Physics*, (1977).
- 601 25. K. Retzer *et al.*, Evolutionary conserved cysteines function as cis-acting regulators of  
602 arabidopsis PIN-FORMED 2 distribution. *International Journal of Molecular Sciences*,  
603 (2017).
- 604 26. W. L. Jorgensen, J. Chandrasekhar, J. D. Madura, R. W. Impey, M. L. Klein, Comparison of  
605 simple potential functions for simulating liquid water. *The Journal of Chemical Physics*,  
606 (1983).
- 607 27. I. S. Joung, T. E. Cheatham, Determination of alkali and halide monovalent ion  
608 parameters for use in explicitly solvated biomolecular simulations. *Journal of Physical*  
609 *Chemistry B*, (2008).
- 610 28. S. Joung, T. E. Cheatham, Molecular dynamics simulations of the dynamic and energetic  
611 properties of alkali and halide ions using water-model-specific ion parameters. *Journal*  
612 *of Physical Chemistry B*, (2009).
- 613 29. N. Homeyer, A. H. C. Horn, H. Lanig, H. Sticht, AMBER force-field parameters for  
614 phosphorylated amino acids in different protonation states: Phosphoserine,  
615 phosphothreonine, phosphotyrosine, and phosphohistidine. *Journal of Molecular*  
616 *Modeling*, (2006).
- 617 30. T. Steinbrecher, J. Latzer, D. A. Case, Revised AMBER parameters for bioorganic  
618 phosphates. *Journal of Chemical Theory and Computation*, (2012).
- 619 31. X. Ye, J. Wang, R. Luo, A revised density function for molecular surface calculation in  
620 continuum solvent models. *Journal of Chemical Theory and Computation*, (2010).
- 621
